# Supplementary material for: Structural Studies of Pif1 Helicases from Thermophilic Bacteria
Source: MDPI journal article supplement (doi:10.3390/microorganisms11020479), 2023-02-14
Supplement: s1 [file s1]

## Structural studies of Pif1 helicases from thermophilic bacteria

Stéphane Réty <sup>1,\*</sup>, Yingzi Zhang <sup>2</sup>, Wentong Fu <sup>2</sup>, Shan Wang <sup>2</sup>, Wei-Fei Chen <sup>2</sup> and Xu-Guang Xi <sup>3,\*</sup>

<sup>1</sup> Laboratoire de Biologie et Modelisation de la Cellule, Ecole Normale Supérieure de Lyon, CNRS, UMR 5239, Inserm, U1293, Université Claude Bernard Lyon 1, 46 allée d'Italie, F-69364 Lyon, France

<sup>2</sup> State Key Laboratory of Crop Stress Biology in Arid Areas, College of Life Sciences, Northwest A&F University, Xianyang 712100, China

<sup>3</sup> Laboratoire de Biologie et Pharmacologie Appliquée (LBPA), UMR8113 CNRS, ENS Paris-Saclay, Université Paris-Saclay, F-91190 Gif-sur-Yvette, France

\* Correspondence: stephane.rety@ens-lyon.fr (S.R.); xxi01@ens-cachan.fr (X.-G.X.)

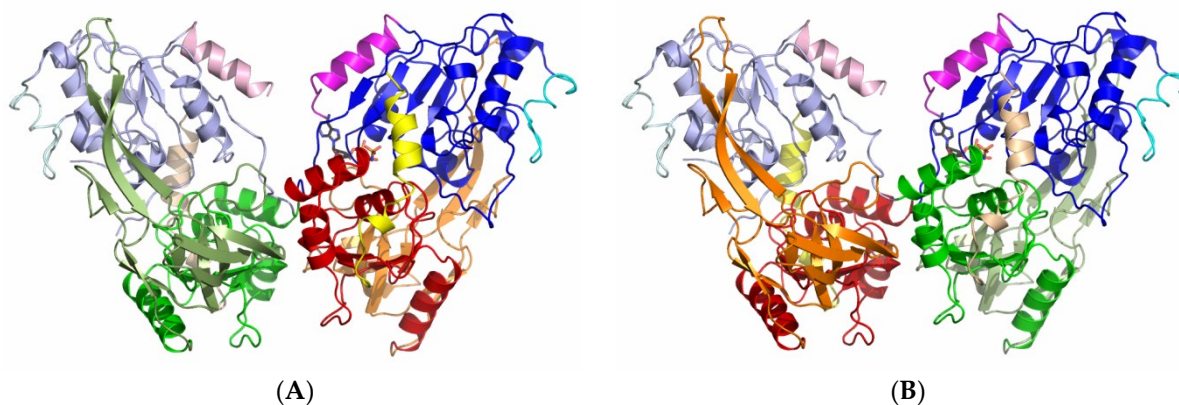

**Figure S1.** Domain swapping in crystal of DdPif1-AMPPNP. **A.** The two molecules built with no domain swapping. Molecule at the right is colored as in Figure 1A. **B.** The 2A and 2B domains have been swapped.

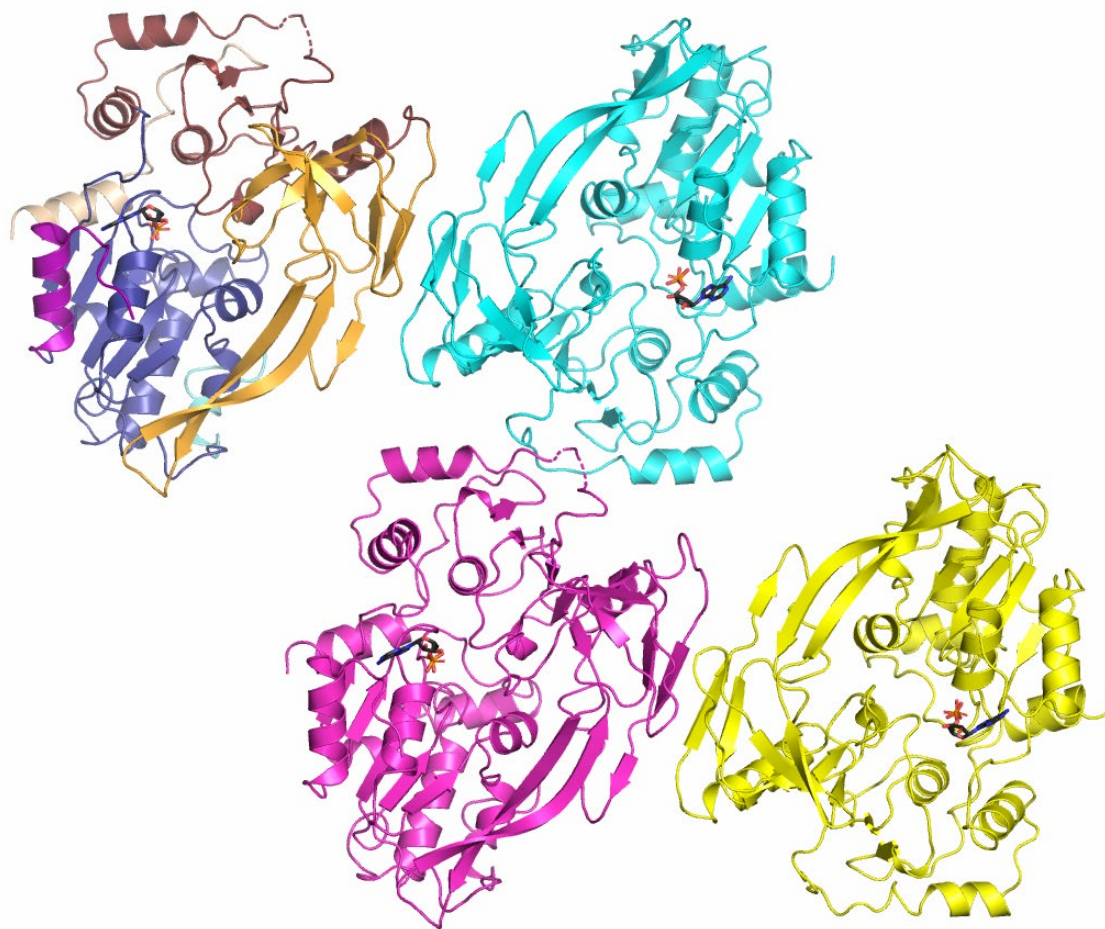

**Figure S2.** SSPif1-ADP crystal packing.

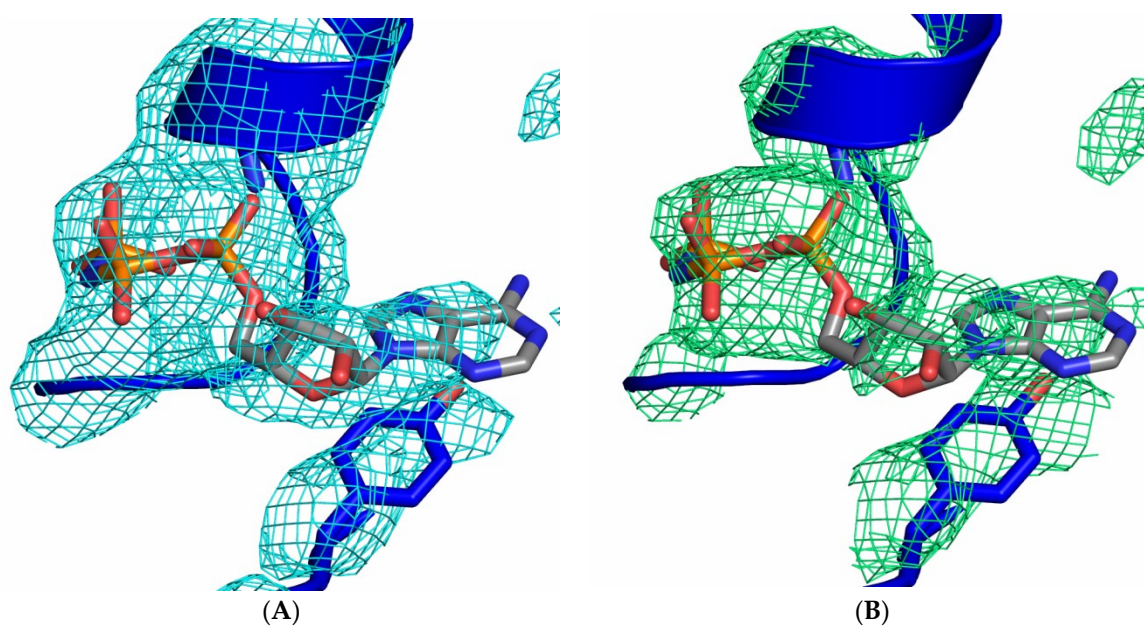

**Figure S3.** Electron density map of DdPif1-AMPPNP complex around nucleotide (colored in grey). **A.** Final 2Fo-Fc map after refinement contoured at  $1.5\sigma$ . **B.** Simulated annealing omit map contoured at  $1.5\sigma$ .

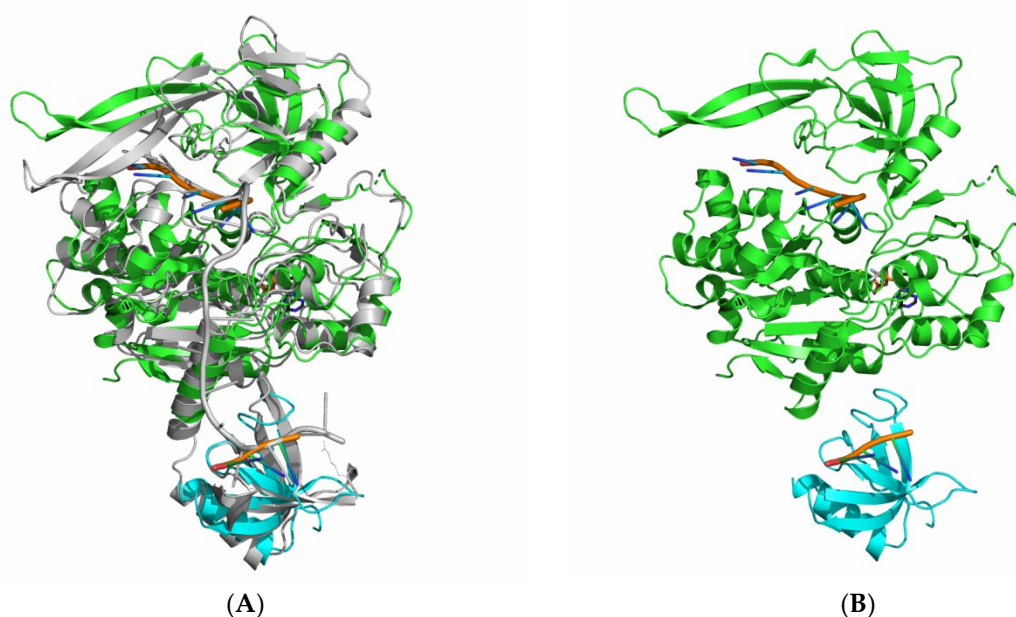

**Figure S4.** DdPif1-ssDNA full length modeling and comparison with templates used. **A.** DdPif1 full length model is colored in grey and the templates BsPif1-ssDNA-ADP-Alf4 (PDB 5FHE) and WYL domain complexed with ssDNA (PDB 7U02) are shown in green and cyan respectively. **B.** For clarity, the templates are shown with no superimposed model.

**Table S1.** X-ray data collection and refinement statistics.

|                                   | SsPif1 (PDB 8BNS)             | DdPif1 apo (PDB 8BNV)         | DdPif1 AMPPNP (PDB 8BNX)         |
|-----------------------------------|-------------------------------|-------------------------------|----------------------------------|
| <b>Data collection</b>            |                               |                               |                                  |
| Wavelength (Å)                    | 0.9778                        | 0.9785                        | 0.9785                           |
| Resolution range (Å)              | 110.1 - 3.24<br>(3.35 - 3.24) | 37.64 - 2.86<br>(2.96 - 2.86) | 71.9 - 3.12<br>(3.23 - 3.12)     |
| Space group                       | P2 <sub>1</sub>               | C222 <sub>1</sub>             | P2 <sub>1</sub> 2 <sub>1</sub> 2 |
| Unit cell                         |                               |                               |                                  |
| a,b,c (Å)                         | 113.138 129.29 113.68         | 88.76 147.05 78.37            | 143. 151.38 51.86                |
| α,β,γ (°)                         | 90 103.4 90                   | 90 90 90                      | 90 90 90                         |
| Unique reflections                | 49971 (266)                   | 12140 (1198)                  | 20930 (2068)                     |
| Multiplicity                      | 3.4 (3.4)                     | 6.4 (6.8)                     | 6.5 (6.9)                        |
| Completeness (%)                  | 91.6 (66.2)                   | 99.49 (100.00)                | 99.87 (100.00)                   |
| Mean I/sigma(I)                   | 5.2 (1.7)                     | 15.11 (2.51)                  | 10.49 (2.56)                     |
| Wilson B-factor (Å <sup>2</sup> ) | 81.71                         | 72.96                         | 97.09                            |
| R-merge                           | 0.150 (0.709)                 | 0.08972 (0.7722)              | 0.1245 (0.7998)                  |
| CC1/2                             | 0.996 (0.726)                 | 0.996 (0.857)                 | 0.991 (0.827)                    |
| <b>Refinement</b>                 |                               |                               |                                  |
| R-work / R-free (%)               | 24.09 / 26.82                 | 20.21 / 24.76                 | 23.99 / 25.48                    |
| Number of non-hydrogen atoms      | 14316                         | 3091                          | 6733                             |
| macromolecules                    | 14208                         | 3077                          | 6702                             |
| ligands                           | 108                           | 15                            | 31                               |
| Protein residues                  | 1732                          | 381                           | 830                              |
| RMS(bonds) (Å)                    | 0.004                         | 0.007                         | 0.003                            |
| RMS(angles) (°)                   | 1.01                          | 0.95                          | 0.68                             |
| Ramachandran favored (%)          | 99.59                         | 99.47                         | 99.51                            |

|                                     |        |       |        |
|-------------------------------------|--------|-------|--------|
| allowed (%)                         | 0.29   | 0.27  | 0.36   |
| outliers (%)                        | 0.12   | 0.27  | 0.12   |
| Average B-factor ( $\text{\AA}^2$ ) | 102.63 | 93.05 | 116.65 |
| macromolecules                      | 102.74 | 93.12 | 116.48 |
| ligands                             | 87.69  | 97.34 | 154.38 |

Statistics for the highest-resolution shell are shown in parentheses.

**Table S2.** SAXS data collection and processing.

| DdPif1 apo                                                  |                 |               |
|-------------------------------------------------------------|-----------------|---------------|
| Structural parameters                                       |                 |               |
| Guinier quality                                             |                 |               |
| Data point                                                  | 63              |               |
| $qR_g$                                                      | 0.408 - 1.296   |               |
| Correlation coefficient                                     | 0.996           |               |
| $I(0)$ (cm <sup>-1</sup> ) [from Guinier]                   | 4.41e03 +/- 9.4 |               |
| $R_g$ (Å) [from Guinier]                                    | 28.52 +/- 0.09  |               |
| $R_g$ (Å) [from $P(r)$ ]                                    | 28.04           |               |
| $D_{\text{max}}$ (Å)                                        | 95.6            |               |
| Porod estimate (Å <sup>3</sup> )                            | 95855           |               |
| Molecular-mass determination                                |                 |               |
| Partial specific volume (cm <sup>3</sup> .g <sup>-1</sup> ) | 0.74            |               |
| Contrast ( $\Delta\rho \cdot 10^{10}$ cm <sup>-2</sup> )    | 2.82            |               |
| Molecular mass $M_r$ [from $V_c$ ] (kDa)                    | 46.5            |               |
| $M_r$ [from $V_p$ ] (kDa)                                   | 49.9            |               |
| Calculated monomeric $M_r$ from sequence (kDa)              | 47.0            |               |
| Data processing                                             |                 |               |
| Primary data reduction                                      | BioXTAS RAW     |               |
| Data processing                                             | PRIMUS          |               |
| <i>Ab initio</i> analysis                                   | DAMMIF          | DENSS         |
| Number of models                                            | 50              | 50            |
| Model $\chi^2$                                              | 1.05 +/- 0.01   | 0.23 +/- 0.18 |
| Validation and averaging                                    | DAMAVR          | DENSS         |
| NSD                                                         | 0.67 +/- 0.15   | 0.86 +/- 0.12 |
| Estimated resolution (Å)                                    | 25 +/- 2.6      | 31.4 +/- 5.2  |
| Rigid-body modelling                                        | DADIMODO        |               |
| Computation of model intensities                            | CRY SOL         |               |
| Model $\chi^2$                                              | 1.224           |               |
